# Supplementary material for: Intraoperative Effect of 2D vs 3D Fluoroscopy on Quality of Reduction and Patient-Related Outcome in Calcaneal Fracture Surgery
Source: PubMed Central journal article supplement (PMC7406967; doi:10.1177/1071100720926111), 2020-06-09
Supplement: Supplementary.pdf [file Supplementary.pdf]

**Supplementary  
Table 4 ROM, patient reported outcomes**

| Characteristic                   |                              | 2D<br>n (%)   | 3D<br>n (%)   | P-value       |               |      |
|----------------------------------|------------------------------|---------------|---------------|---------------|---------------|------|
| <b>Dorsi/plantar flexion (°)</b> | 1 yr                         | 50.0 (30-80)  | 55.0 (20-80)  | 0.44          |               |      |
|                                  | 2 yr                         | 50.0 (30-90)  | 55.0 (20-80)  | 0.43          |               |      |
| <b>In/Eversion (°)</b>           | 1 yr                         | 15.0 (0-50)   | 20.0 (0-60)   | 0.80          |               |      |
|                                  | 2 yr                         | 7.5 (0-60)    | 10.0 (0-40)   | 0.48          |               |      |
| <b>AOFAS, median (range)</b>     | 1yr                          | 80.5 (54-97)  | 78.0 (38-97)  | 0.19          |               |      |
|                                  | 2 yr                         | 82.0 (46-100) | 80.0 (26-100) | 0.51          |               |      |
| <b>FAOS, median (range)</b>      | Symptoms                     | 1yr           | 57.1 (18-82)  | 55.4 (29-82)  | 0.75          |      |
|                                  |                              | 2 yr          | 57.1 (29-86)  | 53.6 (29-79)  | 0.51          |      |
|                                  | Pain                         | 1yr           | 65.3 (3-100)  | 69.4 (39-100) | 0.37          |      |
|                                  |                              | 2 yr          | 75.0 (6-100)  | 75.0 (28-100) | 0.82          |      |
|                                  | ADL                          | 1yr           | 82.4 (19-100) | 79.4 (32-100) | 0.94          |      |
|                                  |                              | 2 yr          | 92.7 (15-100) | 86.8 (32-100) | 0.50          |      |
|                                  | Sport/Recreation             | 1yr           | 40.0 (0-100)  | 45.0 (0-100)  | 0.90          |      |
|                                  |                              | 2 yr          | 65.0 (0-100)  | 70.0 (0-100)  | 0.50          |      |
|                                  | Quality of Life              | 1yr           | 56.3 (6-100)  | 43.8 (0-94)   | 0.34          |      |
|                                  |                              | 2 yr          | 56.3 (0-94)   | 86.8 (32-100) | 0.88          |      |
|                                  | <b>SF-36, median (range)</b> | PCS           | 1yr           | 43.1 (23-59)  | 41.9 (27-59 ) | 0.96 |
|                                  |                              |               | 2 yr          | 48.6 (29-61)  | 45.2 (27-61)  | 0.43 |
| MCS                              |                              | 1yr           | 56.5 (28-65)  | 41.9 (27-59)  | 0.17          |      |
|                                  |                              | 2 yr          | 50.9 (20-60)  | 52.6 (26-61)  | 0.71          |      |

CI: confidence interval; PCS: physical component scale; MCS: mental component scale;
